# Supplementary material for: Sperm chromatin condensation defects and IVF outcomes: a retrospective cohort study
Source: PeerJ journal article supplement (doi:10.7717/peerj.20749), 2026-01-29

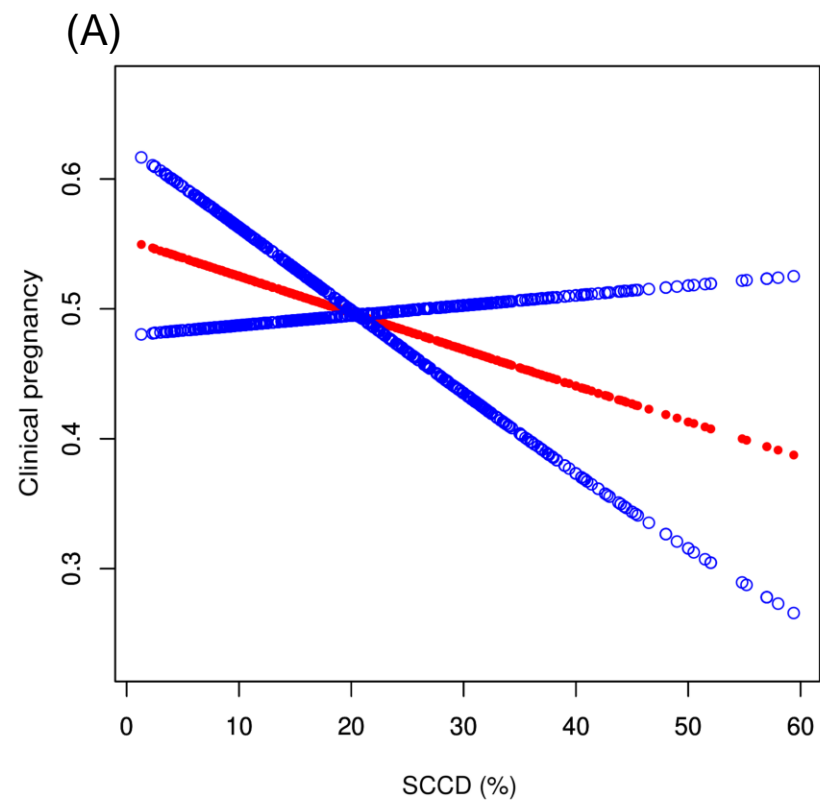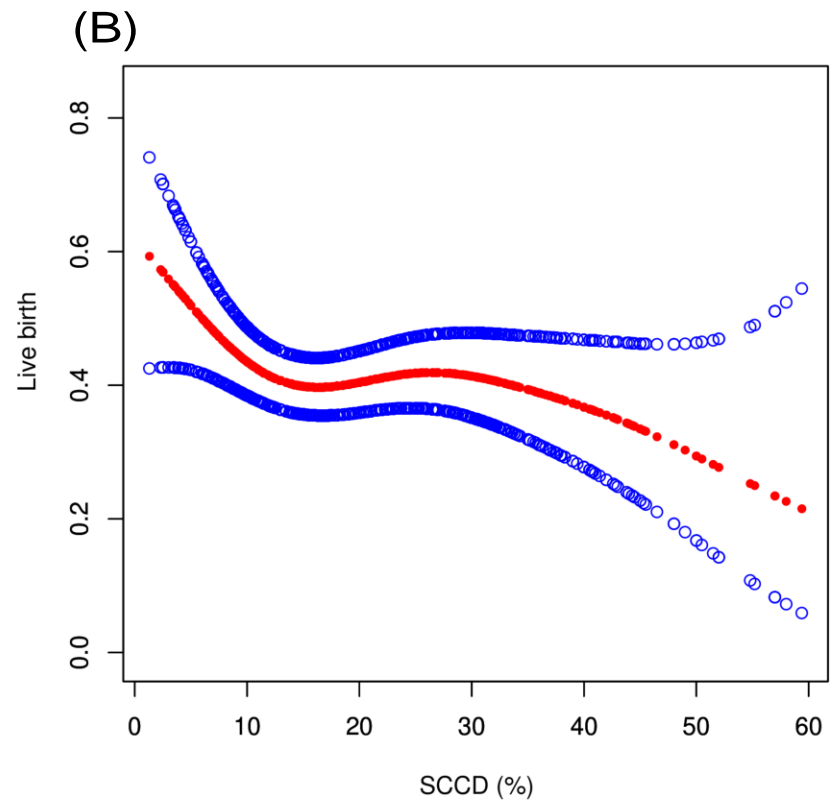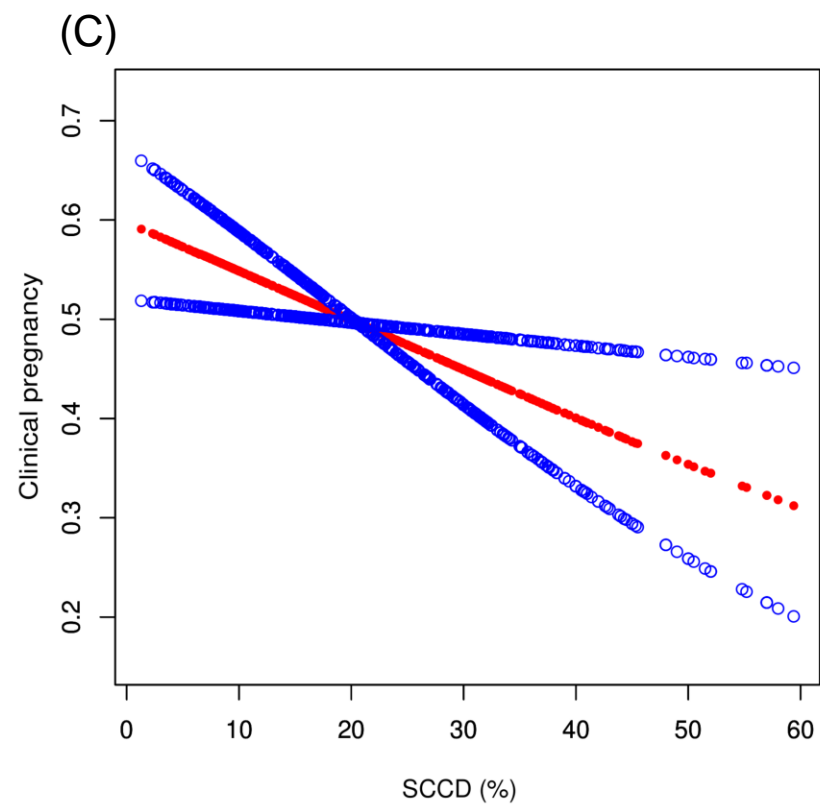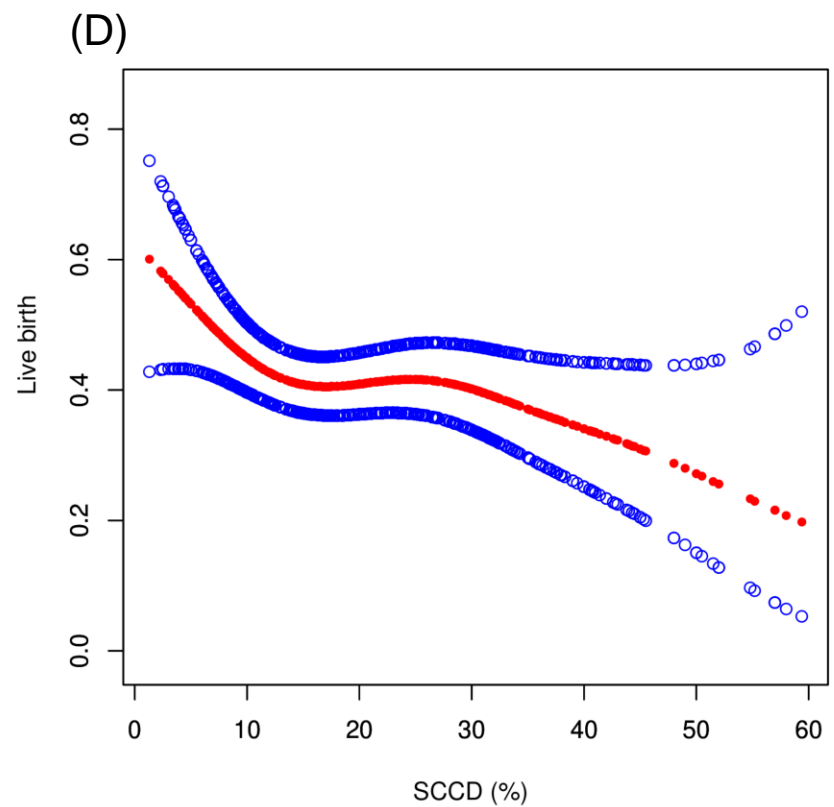

Supplement: Supplementary_figure_S2.pdf [file Supplementary_figure_S2.pdf]
